# Supplementary material for: One-step ethylene purification from ternary mixtures by an ultramicroporous material with synergistic binding centers
Source: Royal Society of Chemistry journal article supplement (doi:10.1039/d3mh00697b), 2023-01-01
Supplement: d3mh00697b1.pdf [file d3mh00697b1.pdf]

## SUPPLEMENTARY INFORMATION

### **One-step Ethylene Purification from Ternary Mixtures by an Ultramicroporous Material with Synergistic Binding Centers**

Xingye Li,<sup>†</sup> Qi Ding,<sup>†</sup> Jia Liu, Lihui Dong, Xingzhen Qin, Liqin Zhou, Zhenxia Zhao,  
Hongbing Ji, Sui Zhang,\* and Kungang Chai\*

## Materials

All the chemicals were obtained from commercial resources and used as received without any further purification.  $\text{Co}(\text{OAc})_2 \cdot 4\text{H}_2\text{O}$  (> 99%) was purchased from Damas-Beta, citric acid monohydrate (AR,  $\geq 99.5\%$ ) and KOH (RG,  $\geq 99.0\%$ ) were purchased from General-Reagent.

## Synthesis of UTSA-16

UTSA-16 was synthesized according to a reported method.<sup>1</sup> A mixture containing 1 mmol of  $\text{Co}(\text{OAc})_2 \cdot 4\text{H}_2\text{O}$ , 1 mmol of citric acid monohydrate, 3 mmol of KOH, 2.5 mL of  $\text{H}_2\text{O}$ , and 2.5 mL of ethanol was added to a Teflon tube, then sealed and placed in an oven with a temperature of 120°C for 48 hours, and then slowly cooled to room temperature. The violet prismatic samples were collected by filtration, then washed with ethyl ether and dried in air. The sample was heated at 90°C under high vacuum for 24 h to obtain the activated UTSA-16.

## Adsorption isotherm measurement

The adsorption isotherms were measured on the instrument of Micromeritics ASAP 2460. Before each measurement, about 100 mg of UTSA-16 was loaded into a glass analysis tube and heated at 90°C for 12 h under a high vacuum ( $< 7 \mu\text{mHg}$ ). The sample was backfilled with  $\text{N}_2$  before transferred to the analysis port, where it was evacuated for another 60 min before the analysis started.

## Powder X-ray diffraction analysis

Powder X-ray diffraction (PXRD) patterns of UTSA-16 were collected using a BRUKER D8 Discover diffractometer ( $\text{Cu K}\alpha \lambda = 1.540598 \text{ \AA}$ ) under 40 kV and 40 mA. The range of  $2\theta$  was from 5° to 50°. In situ PXRD patterns were collected with a chamber holding the sample, which was firstly activated under 120°C for 30 min. After cooled to room temperature, a flow of single gas was introduced into the chamber with a rate of 3 mL  $\text{min}^{-1}$  until the pressure reached 100 kPa. The XRD pattern was collected every 15 min. Rietveld refinement was performed on the PXRD data obtained under 100 kPa using the Reflex Module in *Materials Studio* software. The ligand molecule and the gas molecule were both treated as rigid bodies during the Rietveld refinements, with the molecule orientation and center of mass freely refined. Final refinement on the positions/orientations of the rigid bodies, thermal factors, occupancies, lattice parameters, background, and profiles converged with satisfactory *R*-factors.

## Energy dispersive X-ray spectrometer analyses

The surface morphology of UTSA-16 was observed by field emission scanning electron microscopy (TESCAN MIRA LMS, Czech Republic), and the corresponding energy dispersive X-ray (EDX) spectrometer analyses were performed by a Oxford Xplore 30 EDX detection system.

## Thermal gravimetric analysis

Thermal gravimetric analysis was performed on a thermal analyzer instrument (HTG-1/2) at a heating rate of 10 °C min<sup>-1</sup> up to 800 °C under flowing nitrogen atmosphere. The amount of sample used during the tests was 10 (± 2) mg.

### In situ Fourier transform infrared spectroscopy

The in situ Fourier transform infrared (FTIR) spectra were recorded using a FTIR spectrometer (Nicolet IS50). A vacuum cell is placed in the sample compartment of the infrared spectrometer with the sample at the focal point of the beam. The cell is connected to different gas lines and a vacuum line for evacuation. Prior to each test, the sample (*ca.* 100 mg) was placed in a vacuum cell and pretreated under high vacuum condition at 90°C for activation, and then cooled to room temperature for recording reference spectrum. Single gas (C<sub>2</sub>H<sub>2</sub>, CO<sub>2</sub>, or C<sub>2</sub>H<sub>4</sub>) was introduced into the cell and the spectra were recorded during the gas exposure until 30 min.

### Calculation of IAST selectivity and separation potential

The adsorption isotherms of C<sub>2</sub>H<sub>2</sub> and CO<sub>2</sub> were fitted using a dual-site Langmuir-Freundlich model

$$q = q_{mA} \frac{b_A p^{c_A}}{1 + b_A p} + q_{mB} \frac{b_B p^{c_B}}{1 + b_B p} \quad (1)$$

Here,  $p$  is the pressure of the bulk gas at equilibrium with the adsorbed phase (kPa),  $q$  is the adsorbed amount per mass of adsorbent (mmol g<sup>-1</sup>),  $q_{mA}$  and  $q_{mB}$  are the saturation capacities of site A and B (mmol g<sup>-1</sup>),  $b_A$  and  $b_B$  are the affinity coefficients of site A and B (kPa<sup>-1</sup>), and  $c_A$  and  $c_B$  represent the deviations from an ideal homogeneous surface.

The adsorption isotherm of C<sub>2</sub>H<sub>4</sub> was fitted using a single-site Langmuir-Freundlich model

$$q = q_{mA} \frac{b_A p^{c_A}}{1 + b_A p} \quad (2)$$

The adsorption selectivity is further calculated by the following equation

$$S_{ads} = \frac{q_1/q_2}{p_1/p_2} \quad (3)$$

$q_1$  and  $q_2$  are the molar loadings in the adsorbed phase in equilibrium with the bulk gas phase with partial pressures  $p_1$  and  $p_2$ .

### Calculation of $Q_{st}$

The adsorption isotherms of C<sub>2</sub>H<sub>2</sub>, CO<sub>2</sub>, and C<sub>2</sub>H<sub>4</sub> measured at different temperatures (273 and 298 K) were firstly fitted with a Virial-type expression

$$\ln p = \ln n + \frac{1}{T} \sum_{i=0}^c a_i n^i + \sum_{j=0}^d b_j n^j \quad (4)$$

Here,  $p$  represents the pressure in mmHg,  $n$  represents the gas uptake in  $\text{mg g}^{-1}$ ,  $T$  represents the temperature in Kelvin,  $a_i$  and  $b_i$  are Virial coefficients independent of temperature,  $c$  and  $d$  are the numbers of coefficients required to adequately describe the isotherms.

The Virial coefficients from  $a_0$  to  $a_c$  were then used to calculate the isosteric heat of adsorption for a single gas according to the following expression

$$Q_{st} = -R \sum_{i=0}^c a_i n^i \quad (5)$$

### Breakthrough experiment

The breakthrough experiments were conducted on a home-built dynamic gas breakthrough equipment. In a typical procedure, a stainless-steel column ( $\Phi 4.6 \times 100$  mm) packed with 1.8 g of UTSA-16 was firstly activated by purge with a flow of He ( $5 \text{ mL min}^{-1}$ ) at  $90^\circ\text{C}$  for 12 h. Gas mixture ( $\text{C}_2\text{H}_2/\text{C}_2\text{H}_4$ ,  $\text{CO}_2/\text{C}_2\text{H}_4$ , or  $\text{C}_2\text{H}_2/\text{CO}_2/\text{C}_2\text{H}_4$  mixture) was then introduced into the column at a constant rate under 298 K and 1 bar. The concentration of the gas eluted from the outlet was detected by chromatography (GC-2018, SHIMADZU) with the thermal conductivity detector TCD. After the breakthrough experiment, the column was regenerated by purge with He at  $90^\circ\text{C}$ .

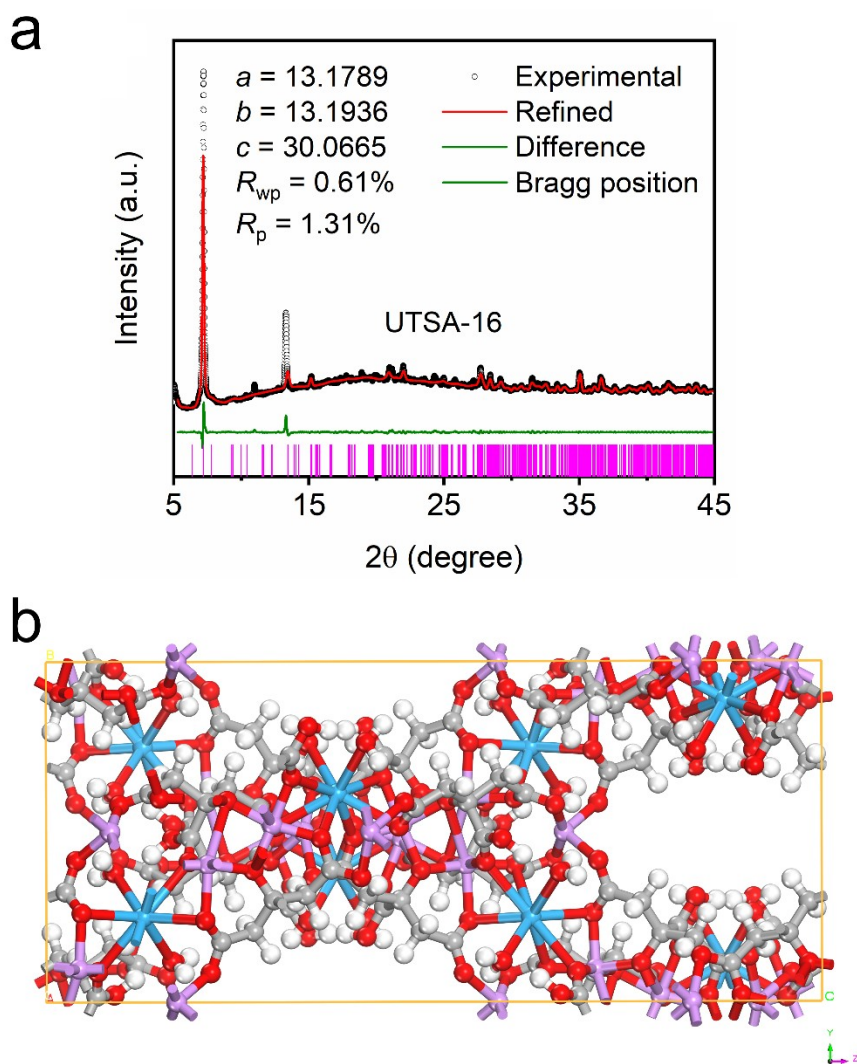

**Figure S1.** (a) Experimental in situ PXRD pattern and refined PXRD pattern of UTSA-16. (b) The refined structure of UTSA-16 (color code: Co, lavender; K, blue; C, gray; H, white; O, red).

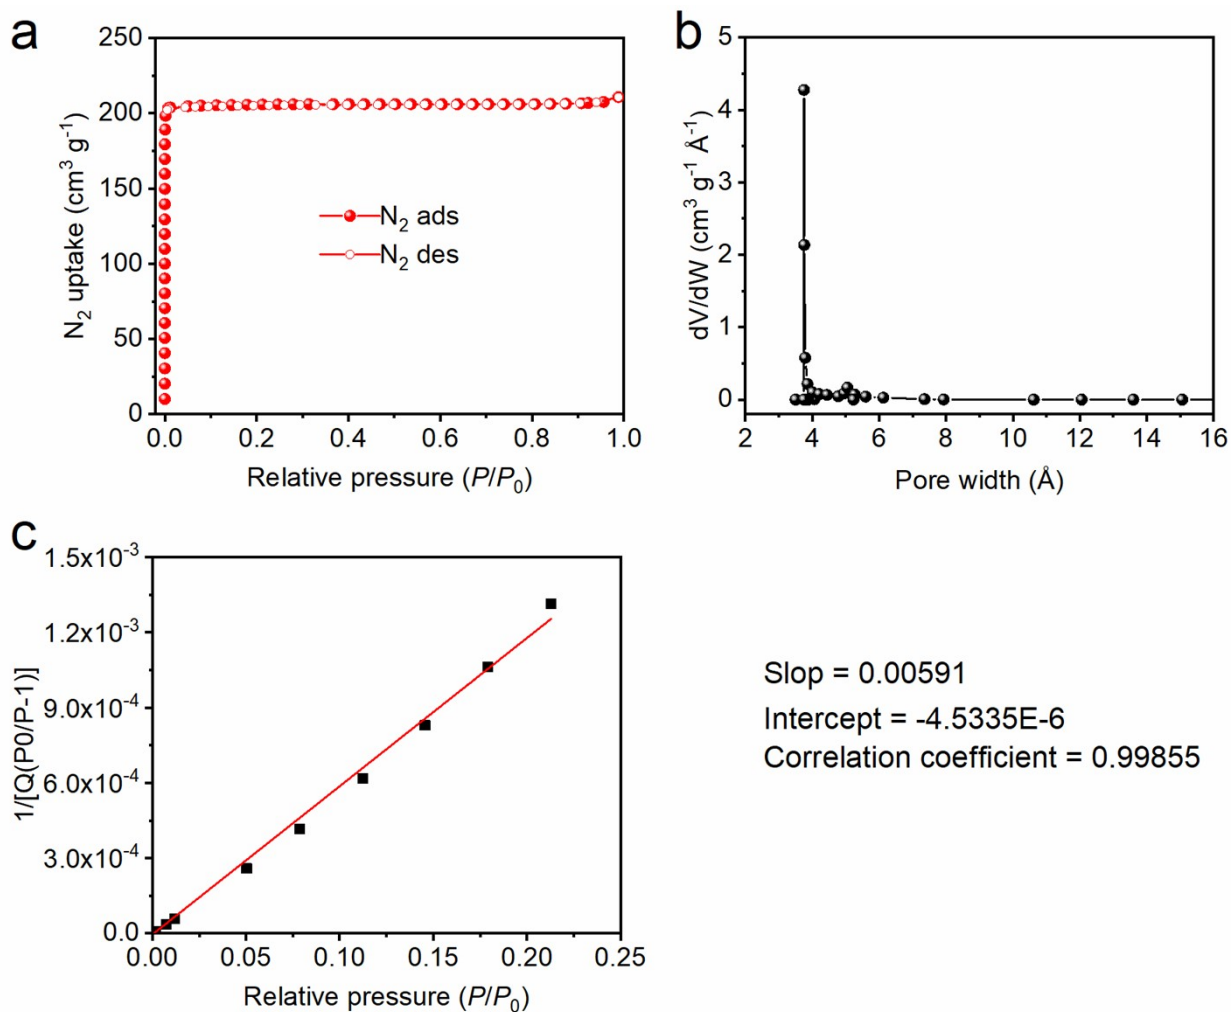

**Figure S2.** (a) Adsorption isotherm of N<sub>2</sub> at 77 K on UTSA-16. (b) Horvath–Kawazoe (HK) pore size distribution of UTSA-16 derived from the N<sub>2</sub> adsorption isotherm. (c) BET surface area fit for UTSA-16 from 77 K N<sub>2</sub> adsorption isotherm.

The BET surface area calculated from the N<sub>2</sub> adsorption isotherms in the pressure range of  $P/P_0 = 0.002-0.21$  is 737.2 m<sup>2</sup> g<sup>-1</sup>.

The total pore volume calculated from the N<sub>2</sub> adsorption isotherms is 0.326 cm<sup>3</sup> g<sup>-1</sup>.

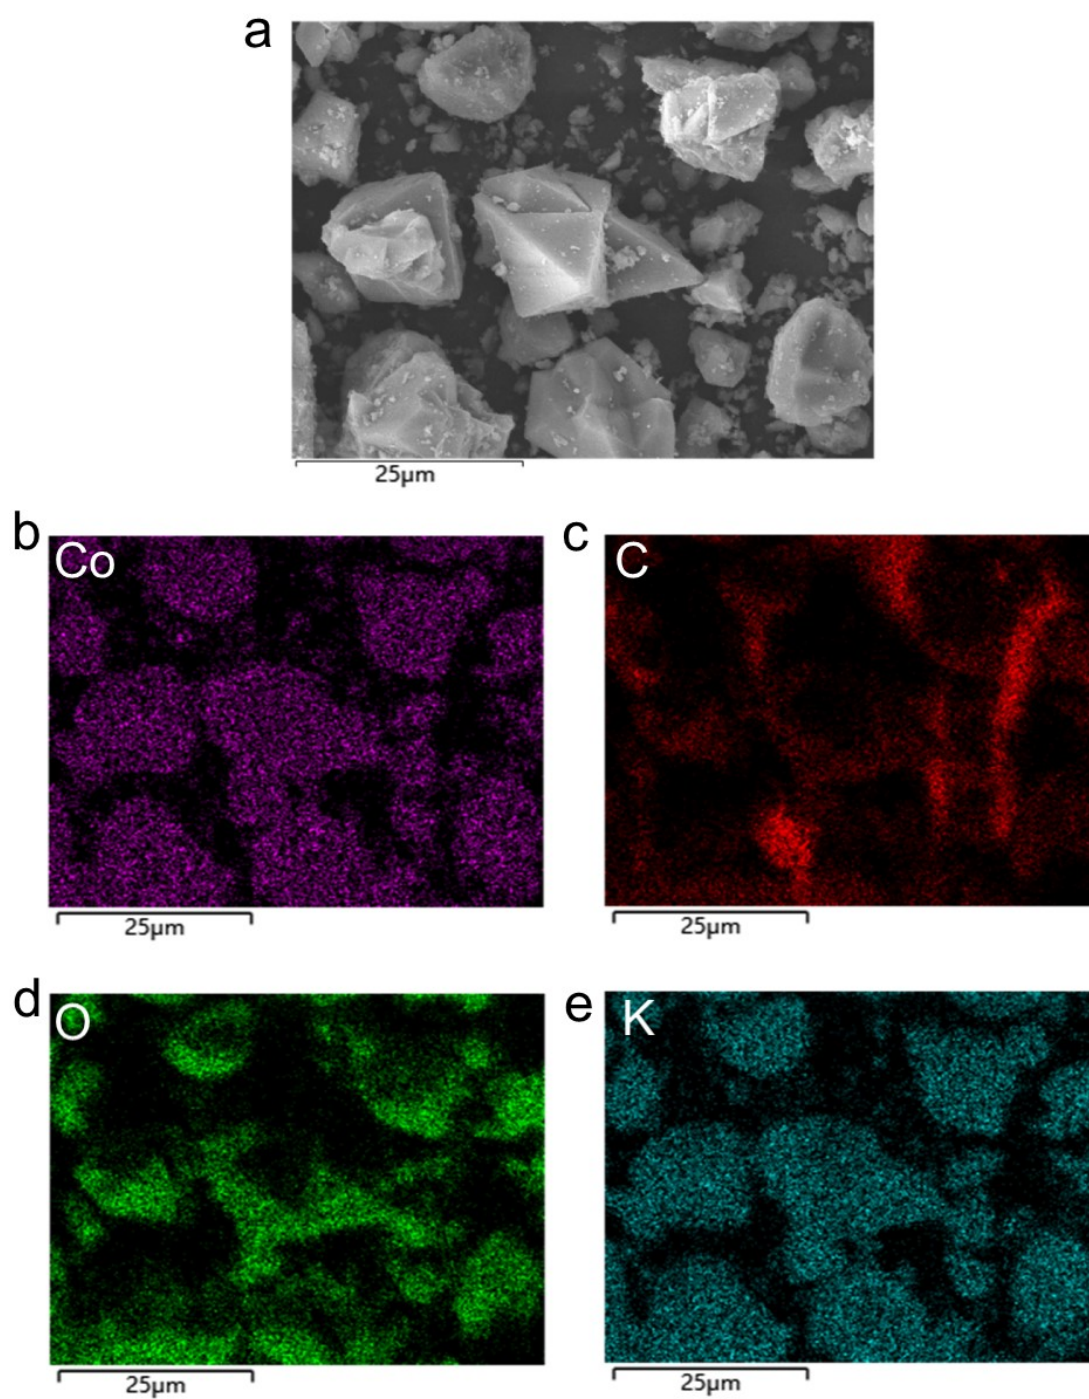

**Figure S3.** (a) SEM image of UTSA-16. (b-e) EDX mapping of Co, C, O, and K.

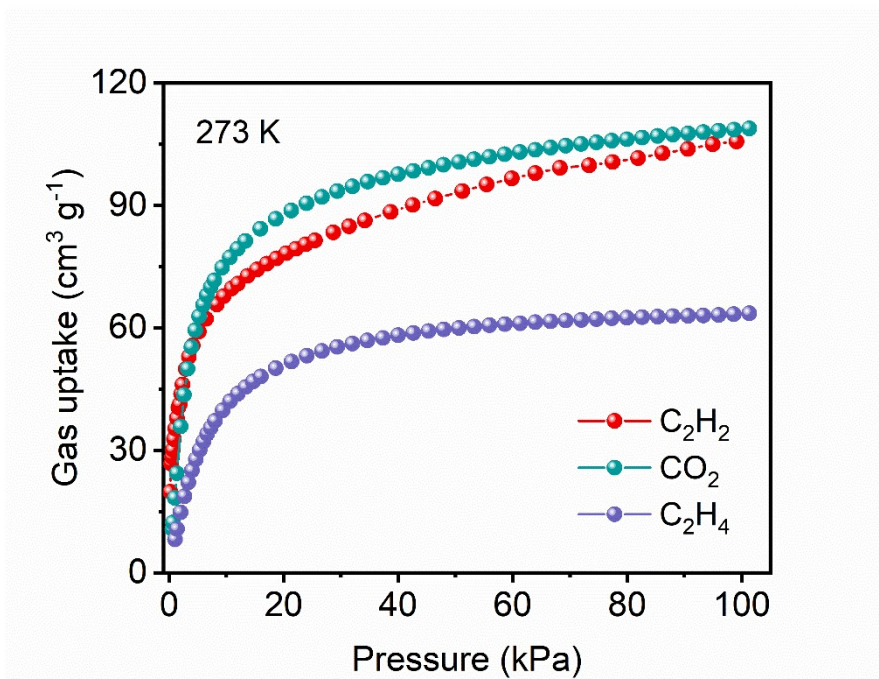

**Figure S4.** Adsorption isotherms of  $C_2H_2$ ,  $CO_2$ , and  $C_2H_4$  on UTSA-16 at 273 K

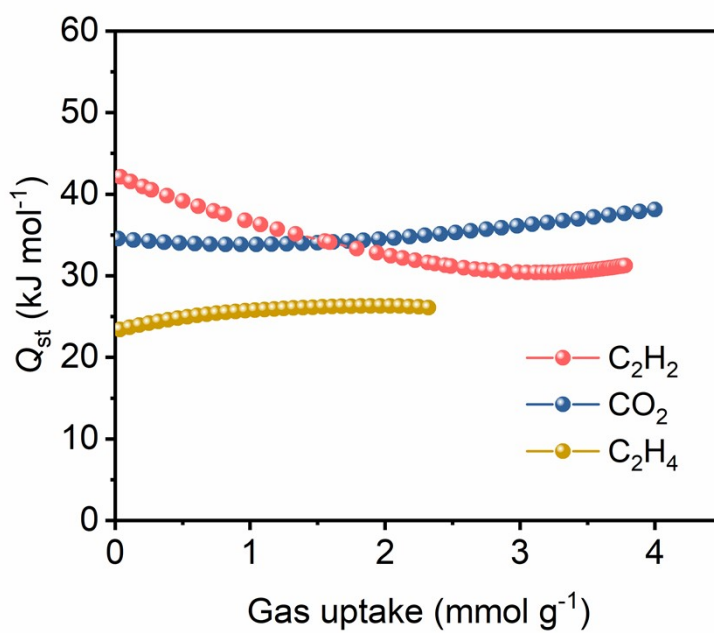

**Figure S5.**  $Q_{st}$  profile of  $C_2H_2$ ,  $CO_2$ , and  $C_2H_4$



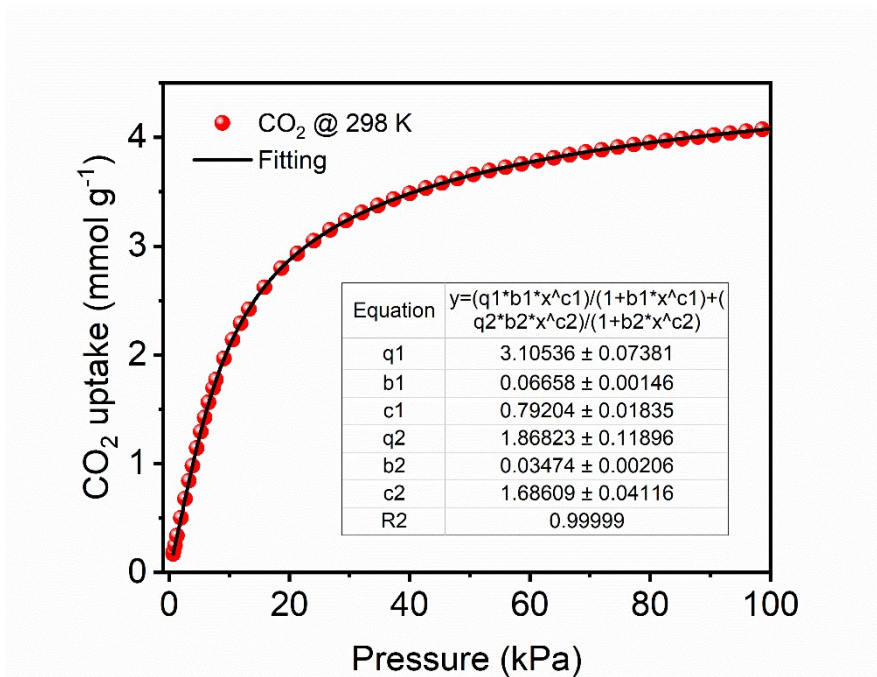

**Figure S6.** Fitting of CO<sub>2</sub> adsorption isotherm at 298 K with Langmuir-Freundlich equation

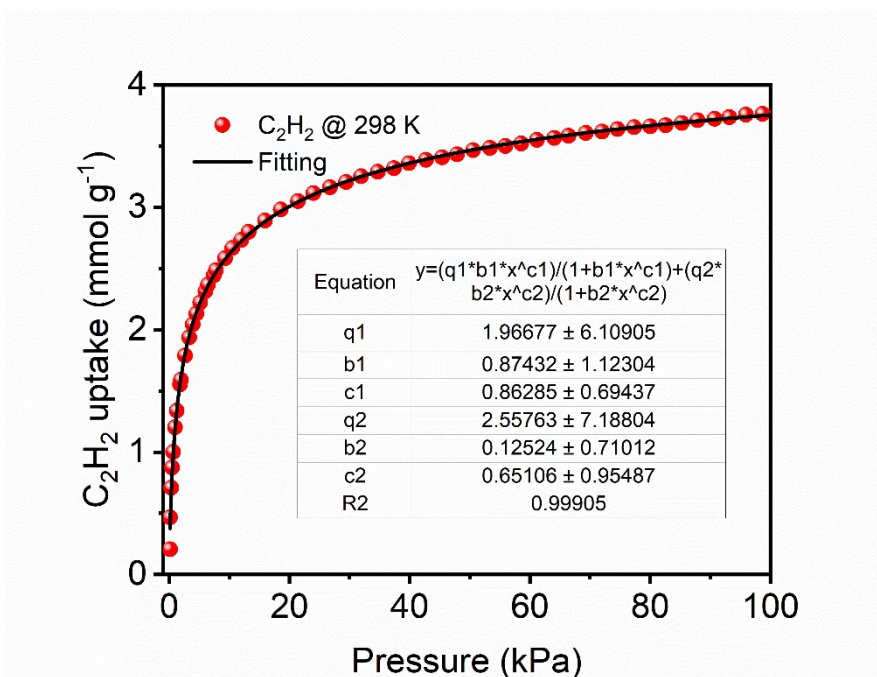

**Figure S7.** Fitting of C<sub>2</sub>H<sub>2</sub> adsorption isotherm at 298 K with Langmuir-Freundlich equation

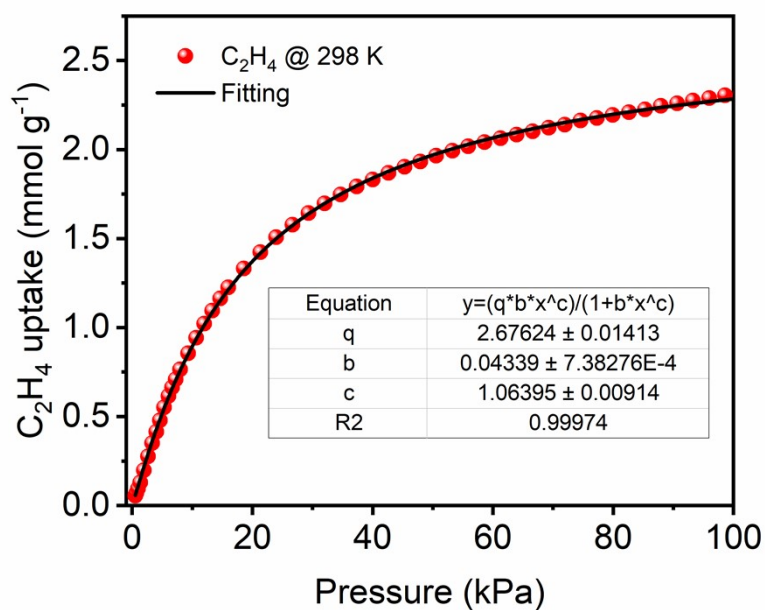

**Figure S8.** Fitting of  $C_2H_4$  adsorption isotherm at 298 K with Langmuir-Freundlich equation

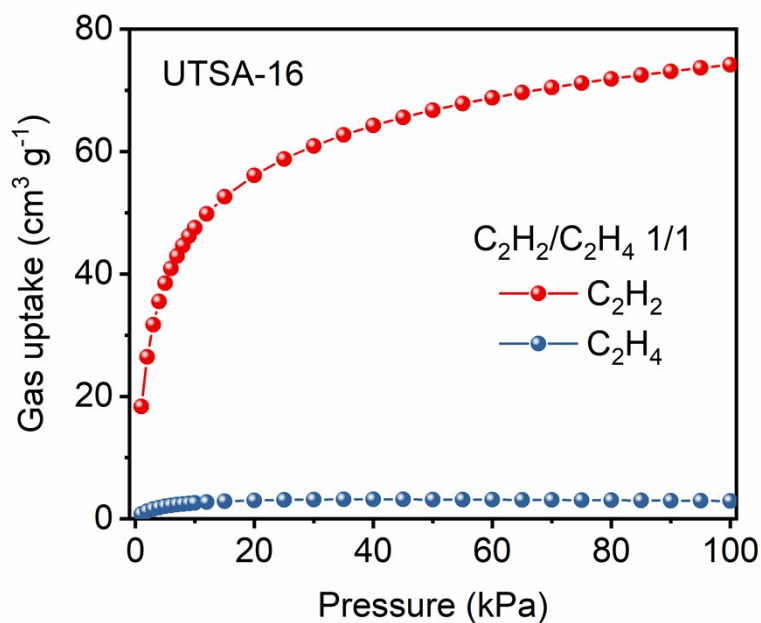

**Figure S9.** IAST predicted binary adsorption isotherms of equimolar  $C_2H_2/C_2H_4$  mixture on UTSA-16 at 298 K

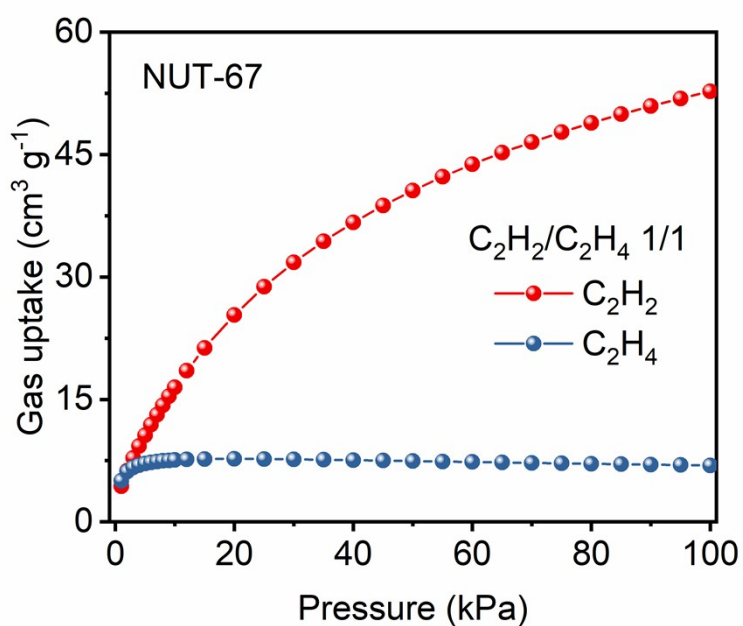

**Figure S10.** IAST predicted binary adsorption isotherms of equimolar  $C_2H_2/C_2H_4$  mixture on NUT-67 at 298 K

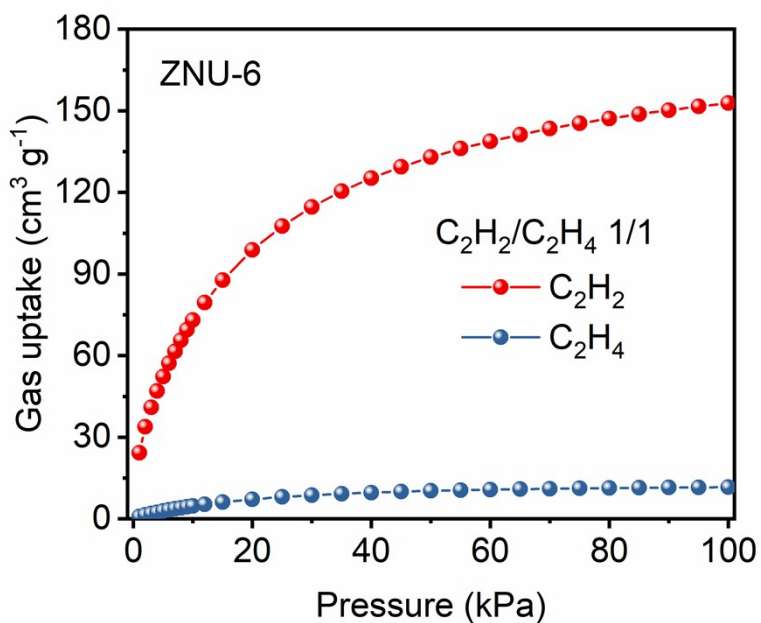

**Figure S11.** IAST predicted binary adsorption isotherms of equimolar  $C_2H_2/C_2H_4$  mixture on ZNU-6 at 298 K

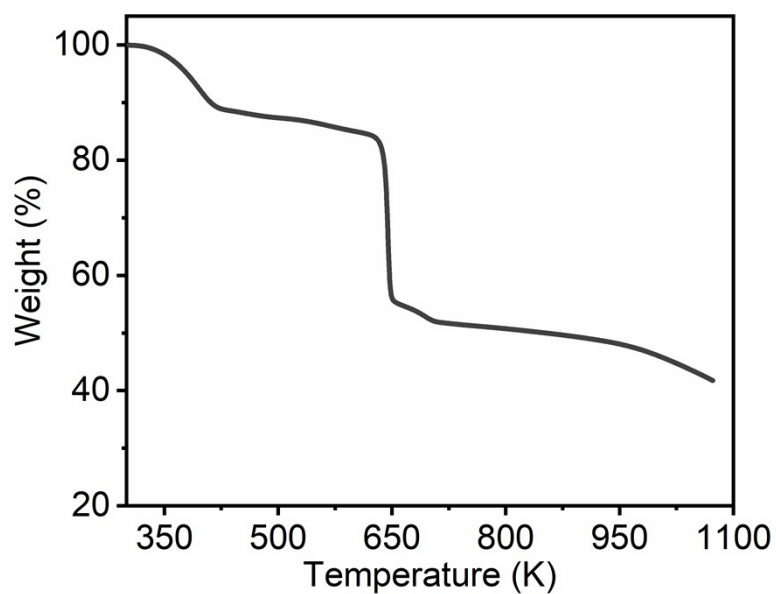

**Figure S12.** TGA curve of UTSA-16

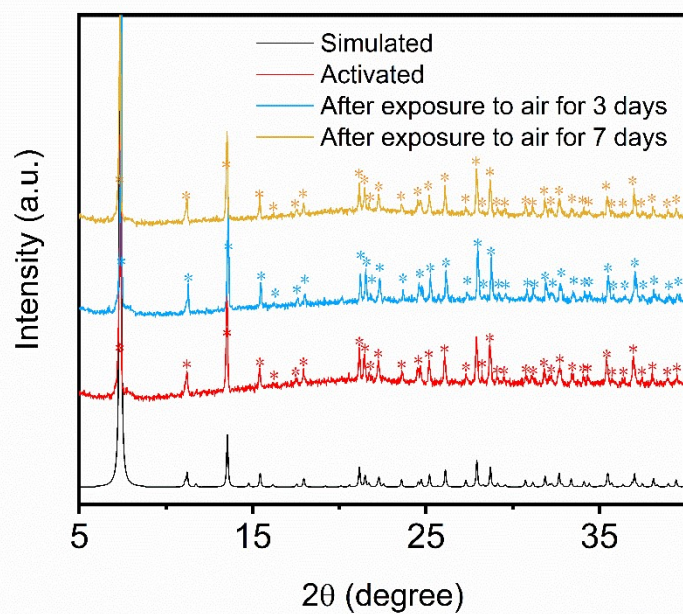

**Figure 13.** Simulated PXRD pattern and the experimental PXRD patterns of UTSA-16 after different treatments (\* refers to characteristic peaks belonging to UTSA-16)

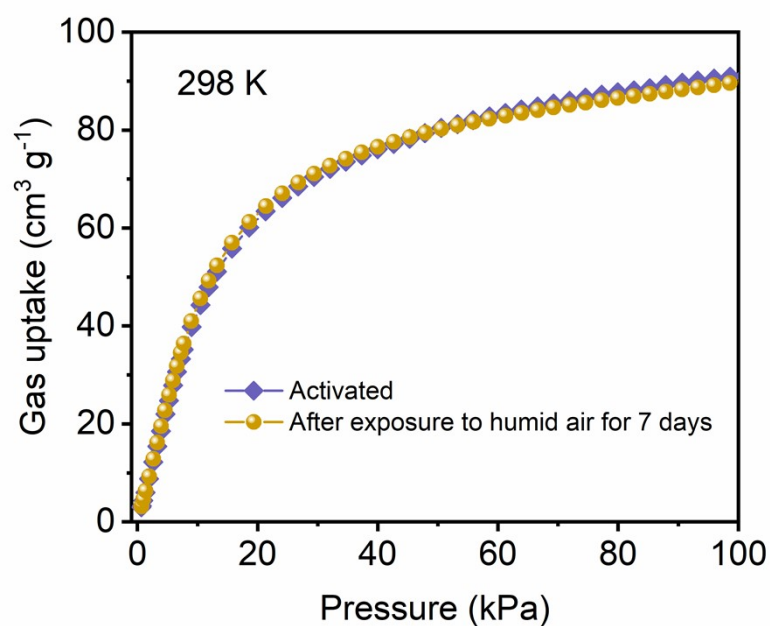

**Figure S14.** CO<sub>2</sub> adsorption isotherm of activated UTSA-16 and UTSA-16 after exposure to humid air (RH = 70%) for 7 days

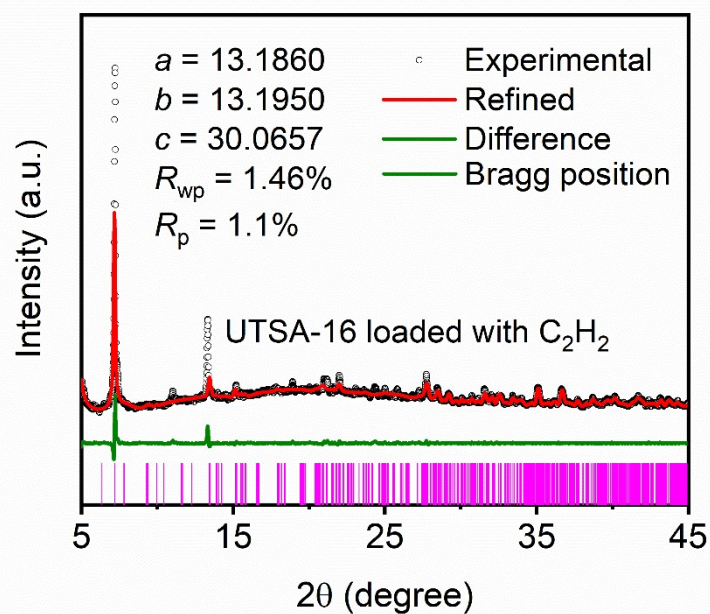

**Figure S15.** Experimental in situ PXRD pattern and refined PXRD pattern of UTSA-16 loaded with C<sub>2</sub>H<sub>2</sub>.

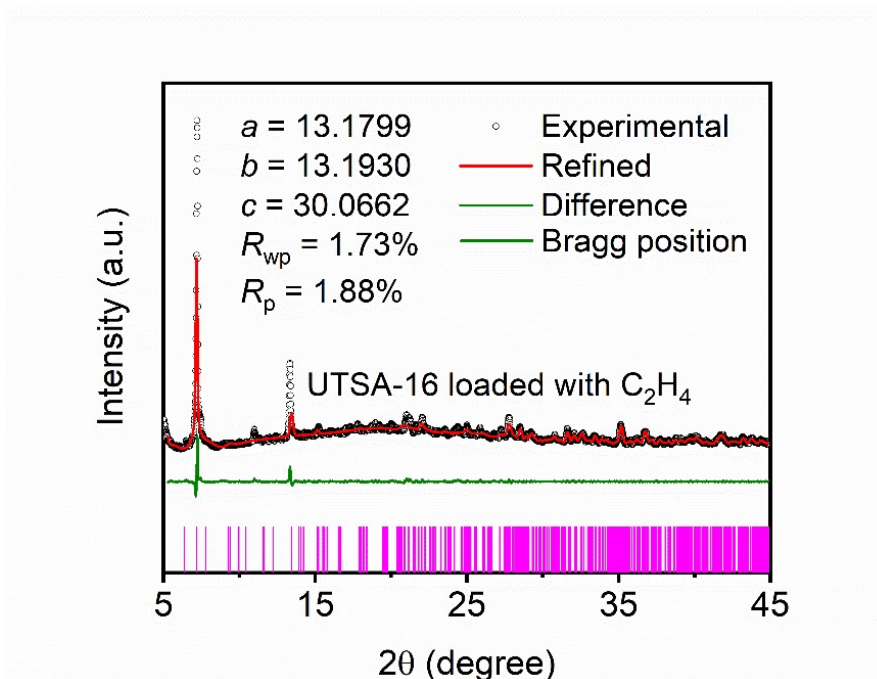

**Figure S16.** Experimental in situ PXR D pattern and refined PXR D pattern of UTSA-16 loaded with  $C_2H_4$ .

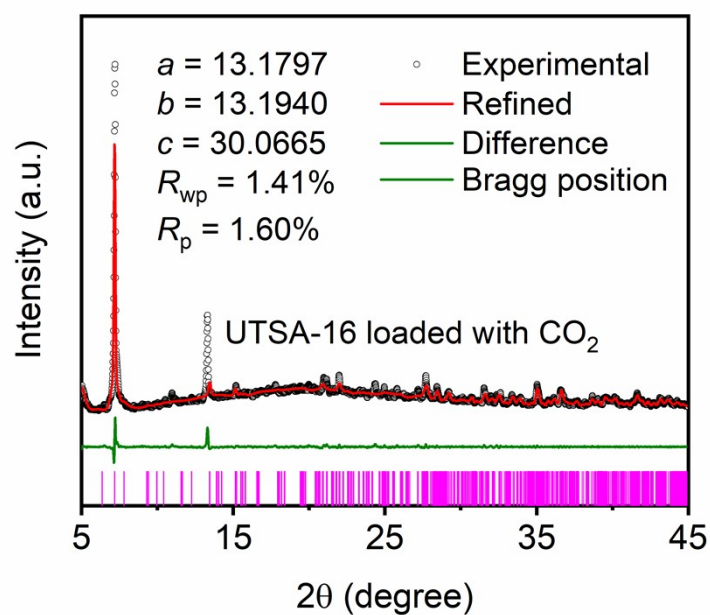

**Figure S17.** Experimental in situ PXR D pattern and refined PXR D pattern of UTSA-16 loaded with  $CO_2$ .

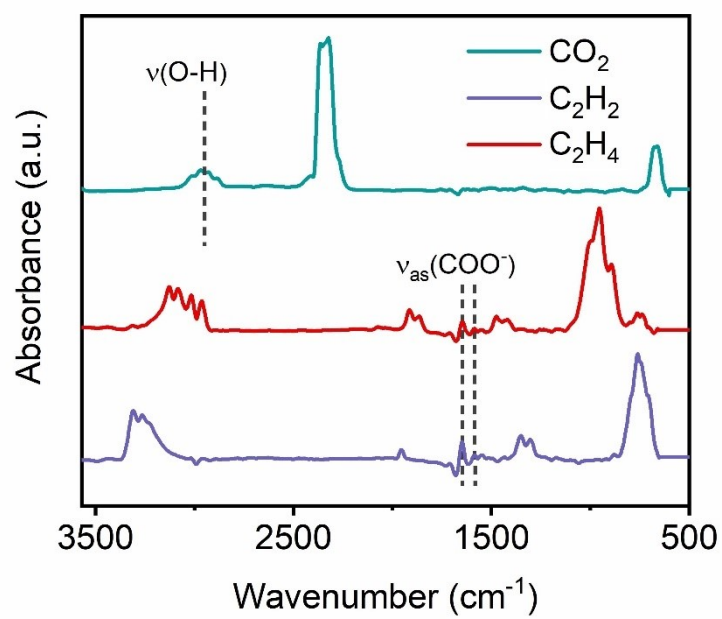

**Figure S18.** A comparison for the in situ infrared spectra of UTSA-16 loaded with different gases

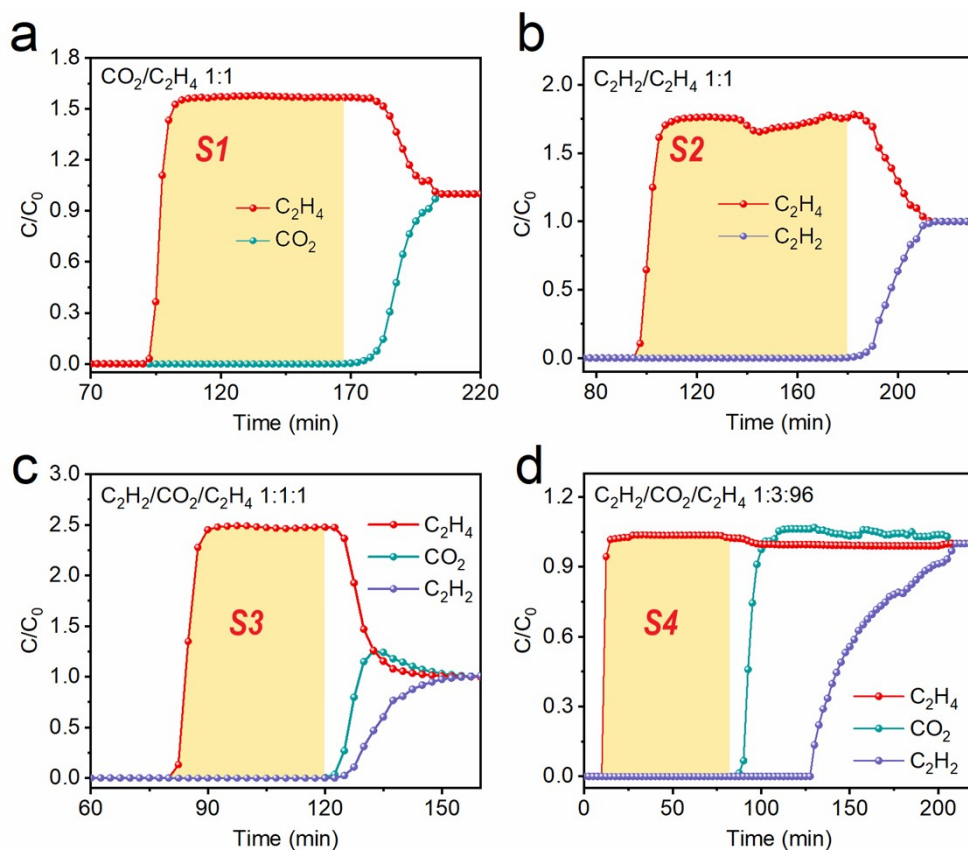

**Figure S19.** Intergration of breakthrough curves for the calculation of  $C_2H_4$  productivity in different breakthrough tests

$$Q_{C_2H_4} = \frac{v \times V\%}{m} \int_{t_0}^{t_1} (c/c_0) dt = \frac{v \times V\%}{m} \times S$$

For 1/1  $CO_2/C_2H_4$  mixture:

$$v = 1 \text{ mL min}^{-1}, V\% = 50\%, m = 1.8 \text{ g}, S1 = 103.40 \text{ min}, Q_{C_2H_4} = 28.7 \text{ L kg}^{-1}$$

For 1/1  $C_2H_2/C_2H_4$  mixture:

$$v = 1 \text{ mL min}^{-1}, V\% = 50\%, m = 1.8 \text{ g}, S2 = 127.78 \text{ min}, Q_{C_2H_4} = 35.5 \text{ L kg}^{-1}$$

For 1/1/1  $C_2H_2/CO_2/C_2H_4$  mixture:

$$v = 1.5 \text{ mL min}^{-1}, V\% = 33.33\%, m = 1.8 \text{ g}, S5 = 98.3 \text{ min}, Q_{C_2H_4} = 27.3 \text{ L kg}^{-1}$$

For 1/3/96  $C_2H_2/CO_2/C_2H_4$  mixture:

$$v = 10 \text{ mL min}^{-1}, V\% = 96\%, m = 1.8 \text{ g}, S3 = 75.60 \text{ min}, Q_{C_2H_4} = 403.2 \text{ L kg}^{-1}$$



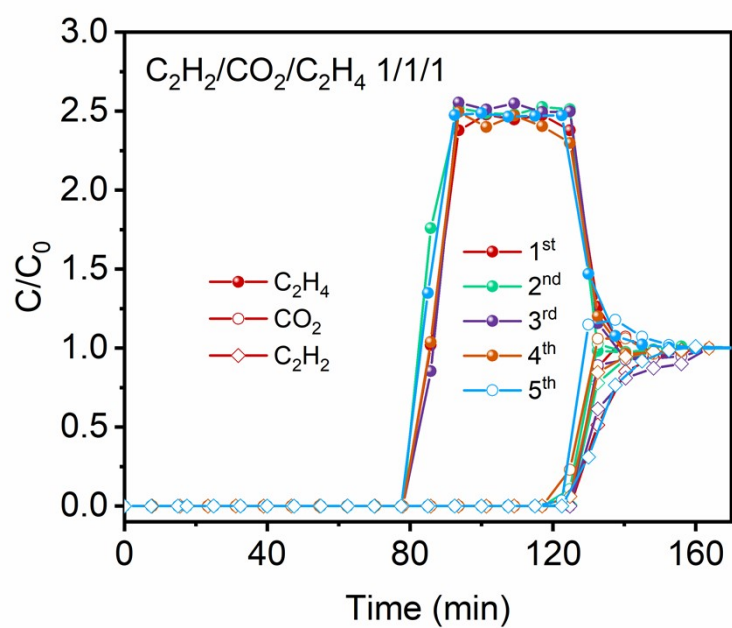

**Figure S20.** Cyclic breakthrough curves for 1/1/1  $C_2H_2/CO_2/C_2H_4$  mixture at 298 K with a gas flow rate of  $1.5 \text{ mL min}^{-1}$

**Table S1.** Properties of C<sub>2</sub>H<sub>2</sub>, CO<sub>2</sub>, and C<sub>2</sub>H<sub>4</sub>

|                                                         | C <sub>2</sub> H <sub>2</sub> | C <sub>2</sub> H <sub>4</sub> | CO <sub>2</sub>    |
|---------------------------------------------------------|-------------------------------|-------------------------------|--------------------|
| Molecular size (Å <sup>3</sup> )                        | 3.32 × 3.34 × 5.70            | 3.28 × 4.18 × 4.84            | 3.18 × 3.33 × 5.36 |
| Kinetic diameter (Å)                                    | 3.3                           | 4.2                           | 3.3                |
| Boiling point (K)                                       | 189.3                         | 169.5                         | 194.7              |
| Polarizability<br>(×10 <sup>-25</sup> cm <sup>3</sup> ) | 33.3–39.9                     | 42.5                          | 29.11              |

**Table S2.** Separation data and decomposition temperature of UTSA-16 and other related adsorbents

|              | Temperature<br>(K) | Gas uptake (cm <sup>3</sup> g <sup>-1</sup> ) |                                             |                              |                               | IAST selectivity                                                     |                                                                     |                                                       | Decomposition<br>temperature<br>(K) | Reference |
|--------------|--------------------|-----------------------------------------------|---------------------------------------------|------------------------------|-------------------------------|----------------------------------------------------------------------|---------------------------------------------------------------------|-------------------------------------------------------|-------------------------------------|-----------|
|              |                    | C <sub>2</sub> H <sub>2</sub> at<br>1 kPa     | C <sub>2</sub> H <sub>2</sub> at<br>100 kPa | CO <sub>2</sub> at<br>10 kPa | CO <sub>2</sub> at<br>100 kPa | 1/99<br>C <sub>2</sub> H <sub>2</sub> /C <sub>2</sub> H <sub>4</sub> | 1/1<br>C <sub>2</sub> H <sub>2</sub> /C <sub>2</sub> H <sub>4</sub> | 1/1<br>CO <sub>2</sub> /C <sub>2</sub> H <sub>4</sub> |                                     |           |
| UTSA-16      | 298                | 28.0                                          | 84.7                                        | 45.0                         | 91.6                          | 18.3                                                                 | 25.4                                                                | 5.7                                                   | 633                                 | This work |
| ZNU-6        | 298                | 34.3                                          | 180.5                                       | 49.5                         | 106.6                         | 14.3                                                                 | 13.2                                                                | 3.9                                                   | 526                                 | 2         |
| NUT-67       | 298                | 28.2<br>(7.5 kPa)                             | 73.7                                        | 31                           | 44.8                          | 8.1                                                                  |                                                                     | 10.8                                                  | 523                                 | 3         |
| NUT-65       | 263                | 16.8                                          | 86.2                                        | 2                            | 79.3                          |                                                                      |                                                                     |                                                       | 573                                 | 4         |
| SIFSIX-17-Ni | 298                | 20.4                                          | 73.9                                        | 20                           | 51.5                          |                                                                      | 506                                                                 |                                                       | 493                                 | 5         |
| TIFSIX-17-Ni | 298                | 30.9                                          | 73.9                                        | 22                           | 47.0                          |                                                                      | 670                                                                 |                                                       | 533                                 | 5         |
| F-PYMO-Cu    | 298                | 8.5<br>(10 kPa)                               | 20.0                                        | 14                           | 31.0                          | 192                                                                  | 10 <sup>8</sup>                                                     |                                                       | 503                                 | 6         |

**Table S3.** Virial fitting parameters of C<sub>2</sub>H<sub>2</sub>, CO<sub>2</sub>, and C<sub>2</sub>H<sub>4</sub>

|       | C <sub>2</sub> H <sub>2</sub> | C <sub>2</sub> H <sub>4</sub> | CO <sub>2</sub> |
|-------|-------------------------------|-------------------------------|-----------------|
| $a_0$ | -5100.70321                   | -2800.0023                    | -4159.39404     |
| $a_1$ | 35.48389                      | -17.28482                     | 4.37354         |
| $a_2$ | -0.52142                      | 0.22197                       | -0.05505        |
| $a_3$ | 0.00927                       | 0.00326                       | 9.75783E-6      |
| $a_4$ | -9.0826E-5                    | -1.23209E-4                   | 8.38182E-7      |
| $a_5$ | 2.79515E-7                    | 9.92177E-7                    | -2.06276E-9     |
| $b_0$ | 15.59128                      | 10.28795                      | 13.57882        |
| $b_1$ | -0.10908                      | 0.05035                       | -0.01449        |
| $b_2$ | 0.00101                       | -2.20884E-4                   | 1.84234E-4      |
| $R^2$ | 0.97229                       | 0.9759                        | 0.99957         |

**Table S4.** Langmuir-Freundlich fitting parameters of C<sub>2</sub>H<sub>2</sub>, CO<sub>2</sub>, and C<sub>2</sub>H<sub>4</sub> for different materials at 298 K (unit: mmol g<sup>-1</sup> for  $q_i$ , kPa<sup>-1</sup> for  $b_i$ )

| Materials | Gas                           | $q_A$   | $b_A$   | $c_A$   | $q_B$   | $b_B$   | $c_B$     | Reference |
|-----------|-------------------------------|---------|---------|---------|---------|---------|-----------|-----------|
| UTSA-16   | C <sub>2</sub> H <sub>2</sub> | 1.96677 | 0.87432 | 0.86285 | 2.55763 | 0.12524 | 0.65106   | This work |
|           | CO <sub>2</sub>               | 3.10536 | 0.06658 | 0.79204 | 1.86823 | 0.03474 | 1.68609   |           |
|           | C <sub>2</sub> H <sub>4</sub> | 2.67624 | 0.04339 | 1.06395 | 0       | 0       | 1         |           |
| ZNU-6     | C <sub>2</sub> H <sub>2</sub> | 1.2     | 4       | 1       | 7.6     | 0.0805  | 1         | 2         |
|           | CO <sub>2</sub>               | 7.7     | 0.00593 | 1       | 1.8     | 0.352   | 1         |           |
|           | C <sub>2</sub> H <sub>4</sub> | 7.6     | 0.0162  | 1       | 0       | 0       | 1         |           |
| NUT-67    | C <sub>2</sub> H <sub>2</sub> | 4.52918 | 0.10655 | 0.67784 | 8.3E-17 | 17.9722 | 2.03715   | 3         |
|           | CO <sub>2</sub>               | 2.34572 | 0.34121 | 0.60063 | 0.00528 | 0.33899 | 153.67101 |           |
|           | C <sub>2</sub> H <sub>4</sub> | 2.28851 | 0.02331 | 0.70616 | 0.4507  | 3.42358 | 1.0109    |           |

**Table S5.** The material cost for the preparation of different materials

| Materials    | Ingredient                                           | Price<br>(\$ kg <sup>-1</sup> ) | Ingredient                       | Price<br>(\$ kg <sup>-1</sup> ) | Ingredient                 | Price<br>(\$ kg <sup>-1</sup> ) | Preparation cost<br>(\$ kg <sup>-1</sup> ) | Reference |
|--------------|------------------------------------------------------|---------------------------------|----------------------------------|---------------------------------|----------------------------|---------------------------------|--------------------------------------------|-----------|
| UTSA-16      | $\text{Co}(\text{OAc})_2 \cdot 4\text{H}_2\text{O}$  | 92                              | KOH                              | 17.63                           | Citric acid<br>monohydrate | 21.6                            | 47.9                                       | This work |
| ZNU-6        | $\text{Cu}(\text{NO}_3)_2 \cdot 3\text{H}_2\text{O}$ | 19.4                            | $(\text{NH}_4)_2\text{GeF}_6$    | 25522                           | Tri(pyridin-<br>4-yl)amine | 98.21                           | 98209                                      | 2         |
| NUT-65       | $\text{CuSiF}_6 \cdot 6\text{H}_2\text{O}$           | 1760                            | 1,4-dibromobenzene               | 62.8                            | Imidazole                  | 53                              | 2505                                       | 4         |
| NUT-67       | $\text{CuSiF}_6 \cdot 6\text{H}_2\text{O}$           | 1760                            | 1,4-dibromobenzene               | 62.8                            | Imidazole                  | 53                              | 2505                                       | 3         |
| F-PYMO-Cu    | $\text{Cu}(\text{NO}_3)_2 \cdot 3\text{H}_2\text{O}$ | 19.4                            | 5-fluoro-2-<br>hydroxypyrimidine | 54478                           |                            |                                 | 40586                                      | 6         |
| SIFSIX-17-Ni | $\text{NiSiF}_6 \cdot 6\text{H}_2\text{O}$           | 330                             | 2-aminopyrazine                  | 4040                            |                            |                                 | 2224                                       | 5         |
| TIFSIX-17-Ni | $\text{NiTiF}_6 \cdot 6\text{H}_2\text{O}$           | 330                             | 2-aminopyrazine                  | 4040                            |                            |                                 | 2137                                       | 5         |

**Table S6.** Experimental dynamic C<sub>2</sub>H<sub>4</sub> productivity for different porous materials

| Material     | Gas composition<br>(C <sub>2</sub> H <sub>2</sub> /CO <sub>2</sub> /C <sub>2</sub> H <sub>4</sub> ) | Temperature<br>(K) | C <sub>2</sub> H <sub>4</sub><br>productivity<br>(L kg <sup>-1</sup> ) | Reference |
|--------------|-----------------------------------------------------------------------------------------------------|--------------------|------------------------------------------------------------------------|-----------|
| UTSA-16      | 1/3/96                                                                                              | 298                | 403.2                                                                  | This work |
| ZNU-6        | 1/5/94                                                                                              | 298                | 478                                                                    | 2         |
| NUT-67       | 0.96/4.04/95.00                                                                                     | 298                | 145                                                                    | 3         |
| F-PYMO-Cu    | 0.97/3/96.03                                                                                        | 298                | 27                                                                     | 6         |
| NUT-65       | 0.967/3.33/95.7                                                                                     | 263                | 26                                                                     | 4         |
| SIFSIX-17-Ni | 1/1/1                                                                                               | 298                | 7.2                                                                    | 5         |
| TIFSIX-17-Ni | 1/1/1                                                                                               | 298                | 15.7                                                                   | 5         |
| UTSA-16      | 1/1/1                                                                                               | 298                | 27.3                                                                   | This work |

## References

- 1 S. Xiang, Y. He, Z. Zhang, H. Wu, W. Zhou, R. Krishna and B. Chen, Microporous metal-organic framework with potential for carbon dioxide capture at ambient conditions, *Nat. Commun.*, 2012, **3**, 954.
- 2 Y. Jiang, Y. Hu, B. Luan, L. Wang, R. Krishna, Haofei Ni, X. Hu and Y. Zhang, Benchmark single-step ethylene purification from ternary mixtures by a customized fluorinated anion-embedded MOF, *Nat. Commun.*, 2023, **14**, 401.
- 3 Q. Dong, Y. Huang, K. Hyeon-Deuk, I.-Y. Chang, J. Wan, C. Chen, J. Duan, W. Jin and S. Kitagawa, Shape- and size-dependent kinetic ethylene sieving from a ternary mixture by a trap-and-flow channel crystal, *Adv. Funct. Mater.*, 2022, **32**, 2203745.
- 4 Q. Dong, X. Zhang, S. Liu, R.-B. Lin, Y. Guo, Y. Ma, A. Yonezu, R. Krishna, G. Liu, J. Duan, R. Matsuda, W. Jin and B. Chen, Tuning gate-opening of a flexible metal-organic framework for ternary gas sieving separation, *Angew. Chem. Int. Ed.*, 2020, **59**, 22756-22762.
- 5 S. Mukherjee, N. Kumar, A. A. Bezrukov, K. Tan, T. Pham, K. A. Forrest, K. A. Oyekan, O. T. Qazvini, D. G. Madden, B. Space and M. J. Zaworotko, Amino-functionalised hybrid ultramicroporous materials that enable single-step ethylene purification from a ternary mixture, *Angew. Chem. Int. Ed.*, 2021, **60**, 10902-10909.
- 6 X. Jiang, T. Pham, Q.-Y. Zhang, J.-W. Cao, K. A. Forrest and K.-J. Chen, Molecular sieving of acetylene from ethylene in a rigid ultra-microporous metal organic framework, *Chem. Eur. J.*, 2021, **27**, 9446-9453.
